# Supplementary material
Source: MDPI journal article supplement (https://www.mdpi.com/2072-4292/7/2/1482)
Supplement: s1 [file s1]

*Supplementary Information*

**Meeting Earth Observation Requirements for Global Agricultural Monitoring: An Evaluation of the Revisit Capabilities of Current and Planned Moderate Resolution Optical Earth Observing Missions. *Remote Sens.* 2015, 7, 1482-1503**

**Alyssa K. Whitcraft <sup>1,\*</sup>, Inbal Becker-Reshef <sup>1,†</sup>, Brian D. Killough <sup>2,†</sup>  
and Christopher O. Justice <sup>1</sup>**

<sup>1</sup> Department of Geographical Sciences, University of Maryland, College Park, 4321 Hartwick Rd. Suite 410, College Park, MD 20742, USA; E-Mails: [ireshef@umd.edu](mailto:ireshef@umd.edu) (I.B.-R.); [cjustice@umd.edu](mailto:cjustice@umd.edu) (C.O.J.)

<sup>2</sup> National Aeronautics and Space Administration—Langley Research Center, Committee on Earth Observation Satellites Systems Engineering Office, Hampton, VA 23681, USA; E-Mail: [brian.d.killough@nasa.gov](mailto:brian.d.killough@nasa.gov)

<sup>†</sup> These authors contributed equally to this work.

\* Author to whom correspondence should be addressed; E-Mail: [alyssakw@umd.edu](mailto:alyssakw@umd.edu); Tel.: +1-301-405-0207.

Academic Editors: Raul Zurita-Milla, Bingfang Wu and Prasad S. Thenkabail

---

## January

Best Case Scenario - FPC  $\geq$  70%

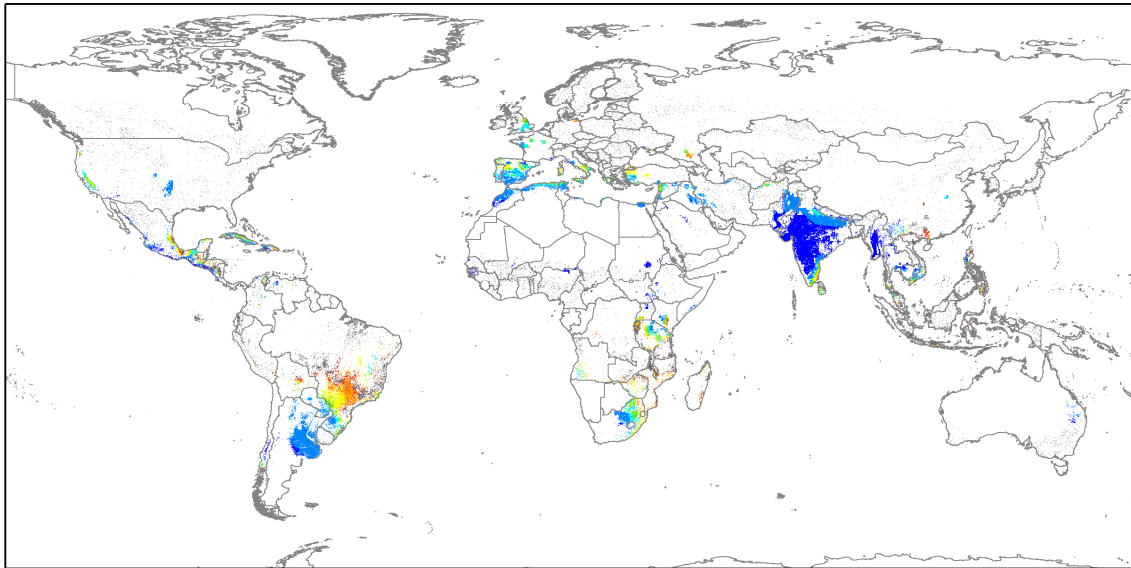

Worst Case Scenario - FPC  $\geq$  95%

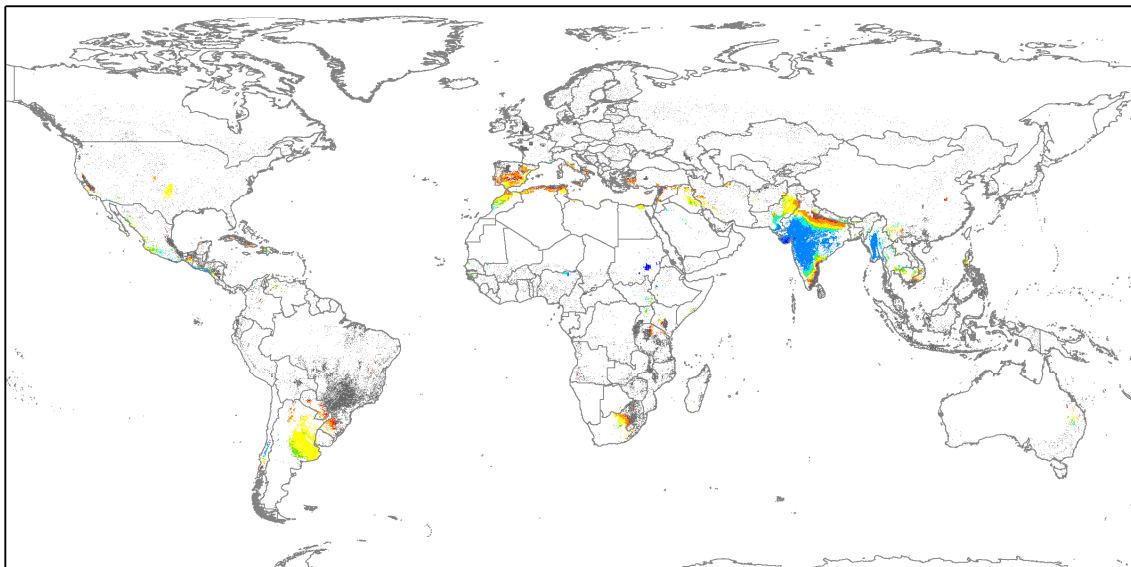

Constellations Capable of Meeting Required Revisit Frequency

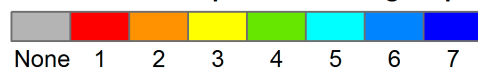

Decimal Degrees  
0 15 30 60

**Figure S1.** During the month of January, where each constellation is capable of meeting the revisit frequency required to yield a view of in-season croplands that is at least 70% ((**top**), “best case scenario”) or 95% ((**bottom**), “worst case scenario”) clear. In-season croplands have been defined by the growing season calendars from Whitcraft *et al.* (2014) [48] and the cropland mask from Fritz *et al.* (2015) [49]. The missions included in Constellations #1–7 can be found in Table 2. Note that constellation number both identifies the constellation, as well as denotes its rank in terms of revisit frequency (with #1 being capable of the most frequent revisit). Areas requiring a revisit more frequent than any hypothetical constellation analyzed herein are shown in gray, and denoted as “None.”

## February

Best Case Scenario - FPC  $\geq$  70%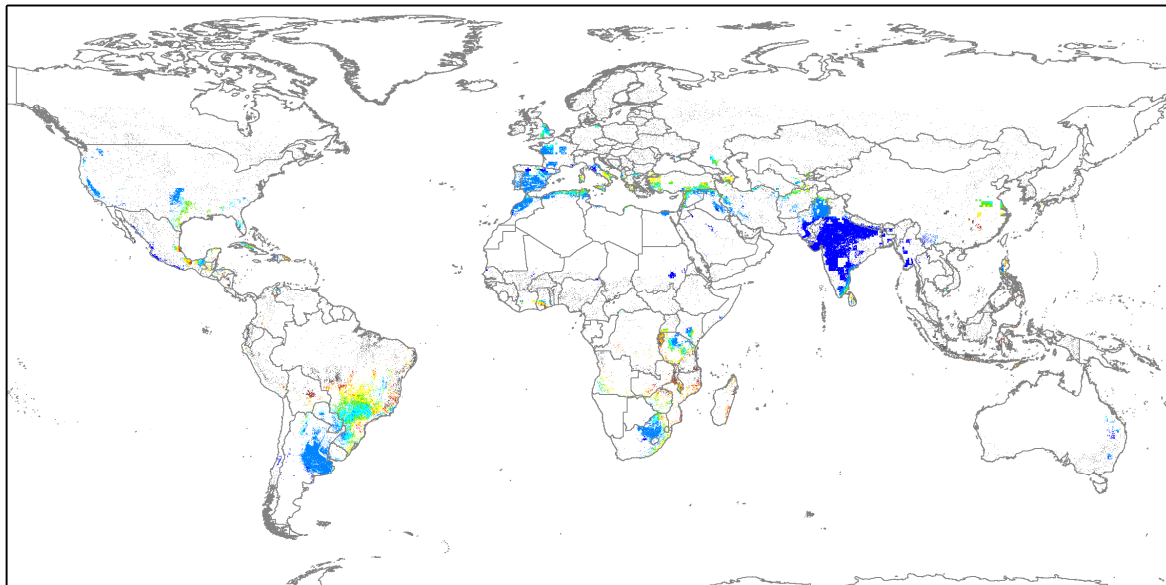Worst Case Scenario - FPC  $\geq$  95%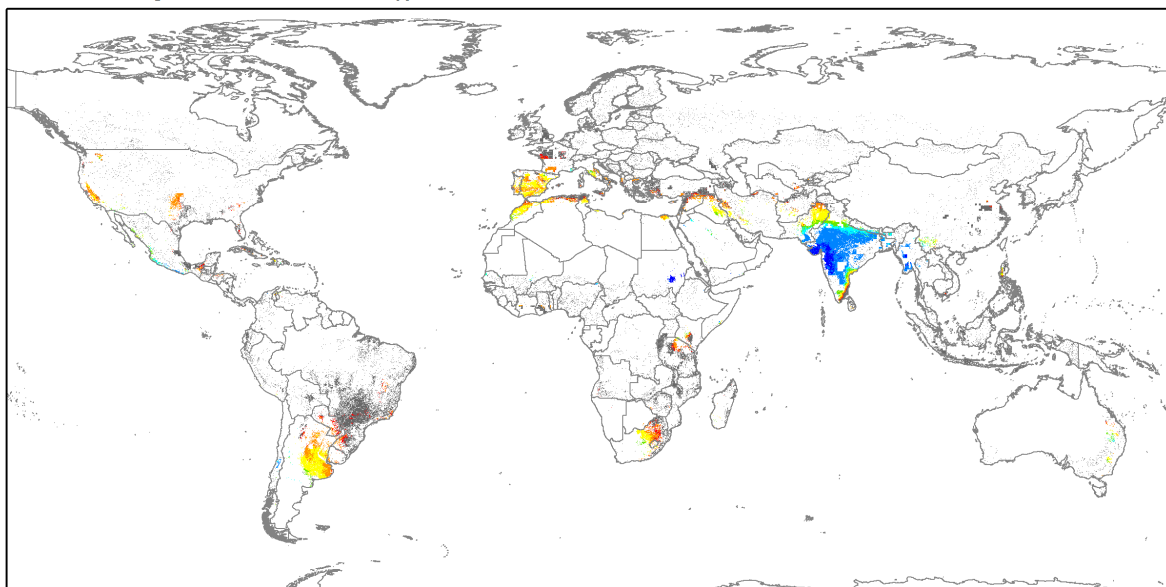

Constellations Capable of Meeting Required Revisit Frequency

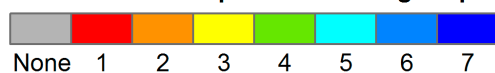Decimal Degrees  
0 15 30 60

**Figure S2.** During the month of February, where each constellation is capable of meeting the revisit frequency required to yield a view of in-season croplands that is at least 70% ((**top**), “best case scenario”) or 95% ((**bottom**), “worst case scenario”) clear. In-season croplands have been defined by the growing season calendars from Whitcraft *et al.* (2014) [48] and the cropland mask from Fritz *et al.* (2015) [49]. The missions included in Constellations #1–7 can be found in Table 2. Note that constellation number both identifies the constellation, as well as denotes its rank in terms of revisit frequency (with #1 being capable of the most frequent revisit). Areas requiring a revisit more frequent than any hypothetical constellation analyzed herein are shown in grey, and denoted as “None.”

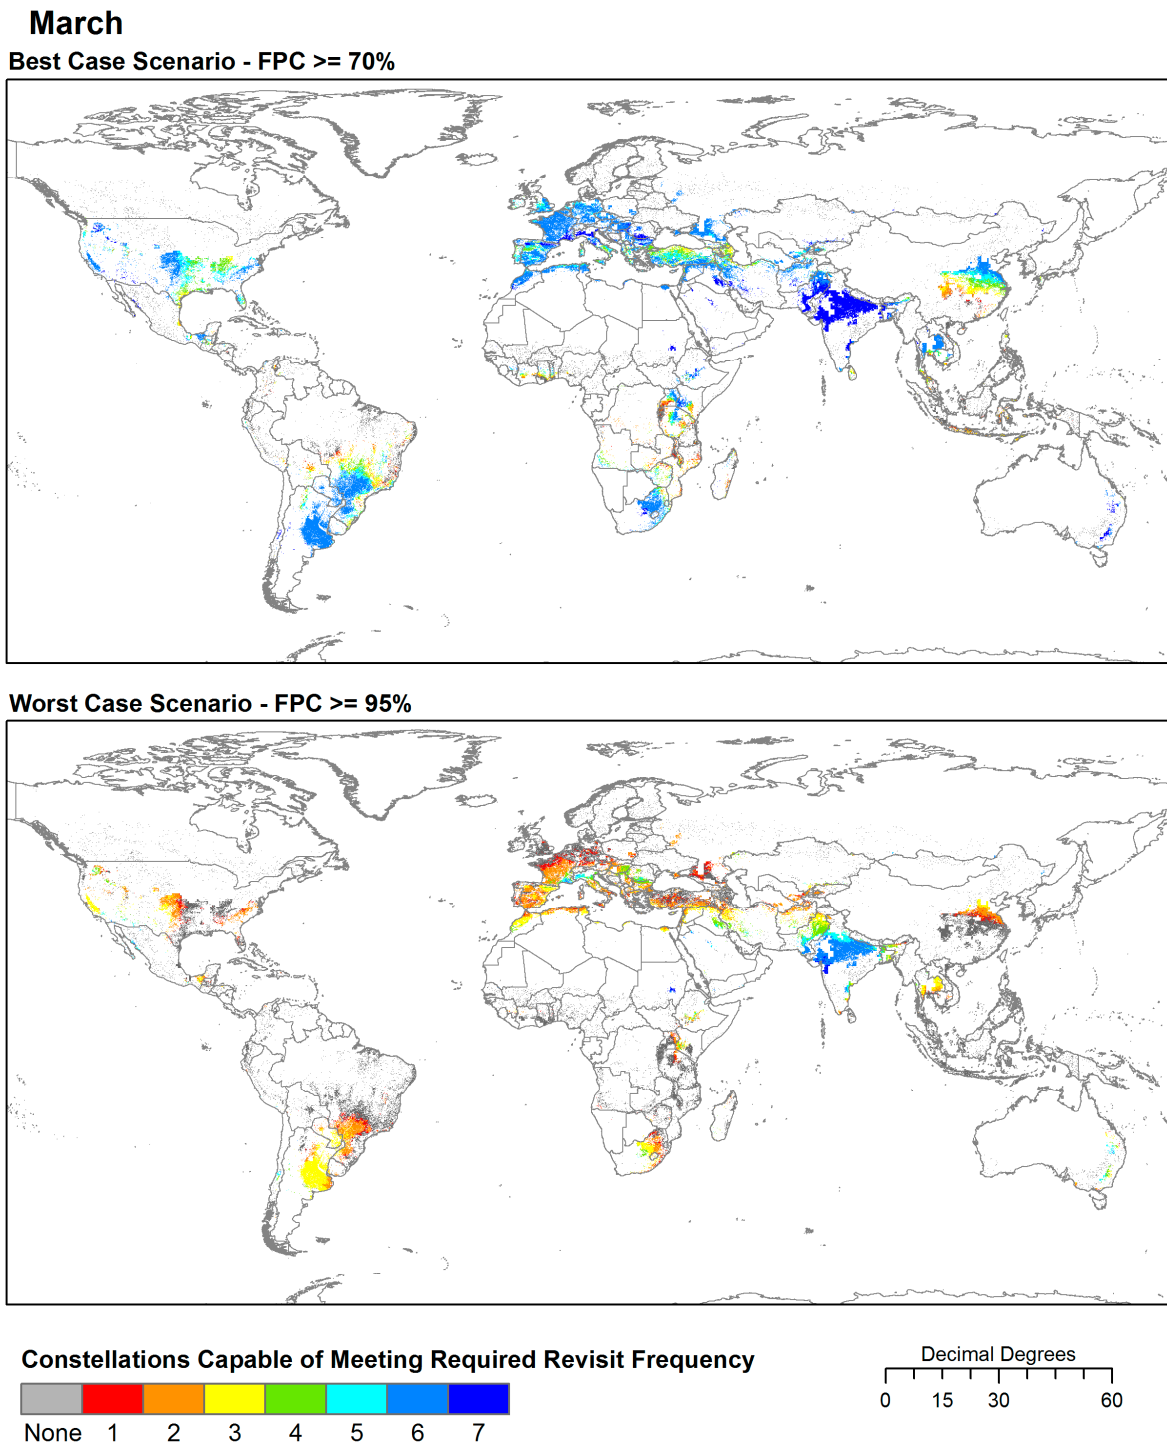

**Figure S3.** During the month of March, where each constellation is capable of meeting the revisit frequency required to yield a view of in-season croplands that is at least 70% ((**top**), “best case scenario”) or 95% ((**bottom**), “worst case scenario”) clear. In-season croplands have been defined by the growing season calendars from Whitcraft *et al.* (2014) [48] and the cropland mask from Fritz *et al.* (2015) [49]. The missions included in Constellations #1–7 can be found in Table 2. Note that constellation number both identifies the constellation, as well as denotes its rank in terms of revisit frequency (with #1 being capable of the most frequent revisit). Areas requiring a revisit more frequent than any hypothetical constellation analyzed herein are shown in gray, and denoted as “None.”

**April**

**Best Case Scenario - FPC  $\geq$  70%**

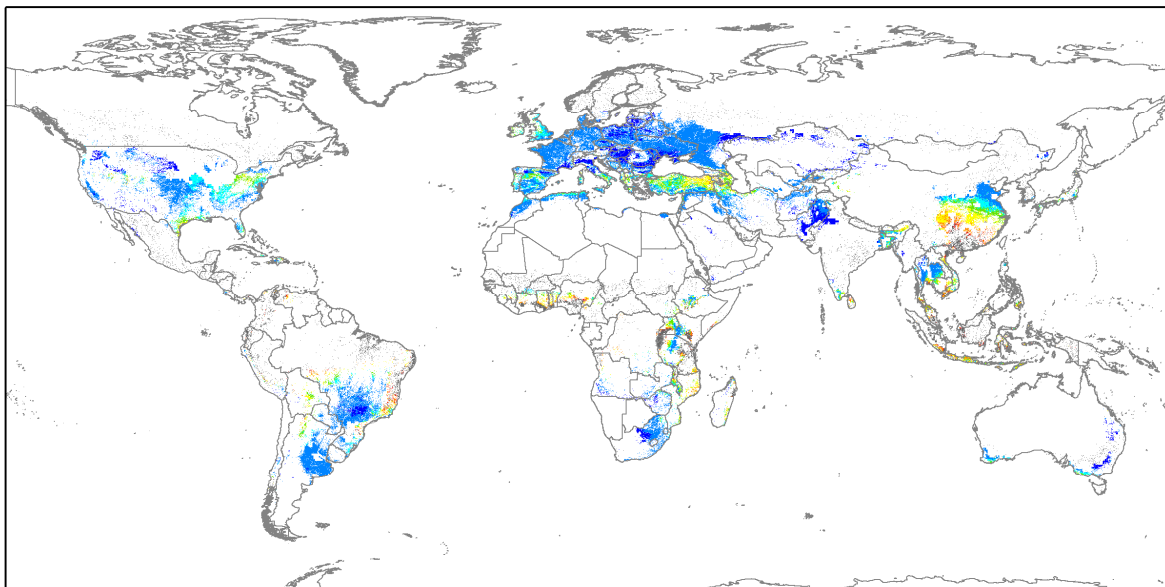

**Worst Case Scenario - FPC  $\geq$  95%**

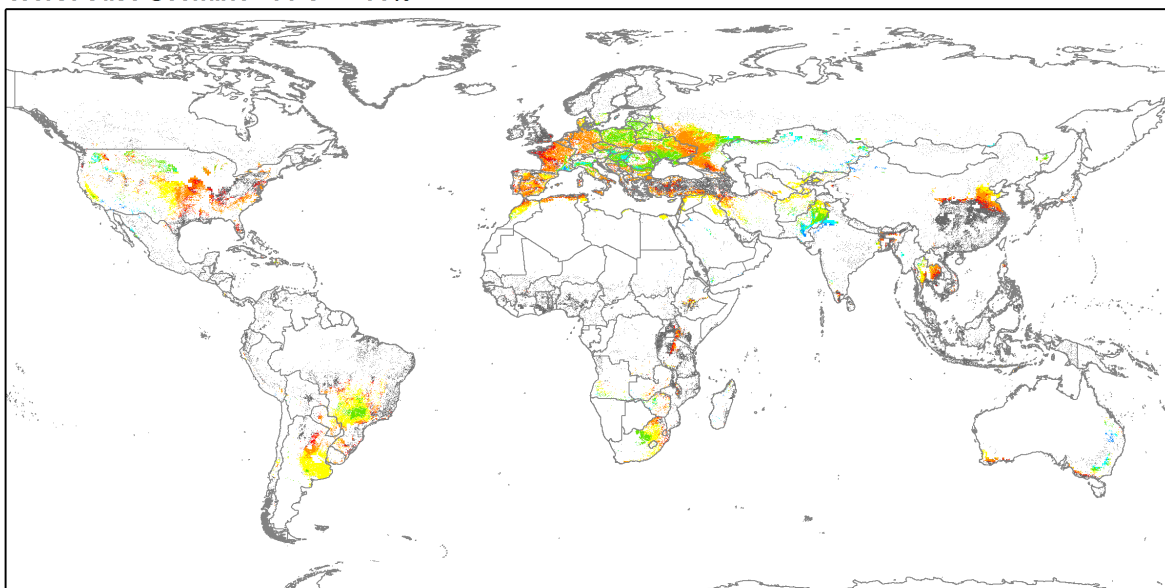

**Constellations Capable of Meeting Required Revisit Frequency**

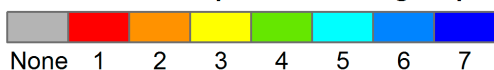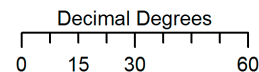

**Figure S4.** During the month of April, where each constellation is capable of meeting the revisit frequency required to yield a view of in-season croplands that is at least 70% ((**top**), “best case scenario”) or 95% ((**bottom**), “worst case scenario”) clear. In-season croplands have been defined by the growing season calendars from Whitcraft *et al.* (2014) [48] and the cropland mask from Fritz *et al.* (2015) [49]. The missions included in Constellations #1–7 can be found in Table 2. Note that constellation number both identifies the constellation, as well as denotes its rank in terms of revisit frequency (with #1 being capable of the most frequent revisit). Areas requiring a revisit more frequent than any hypothetical constellation analyzed herein are shown in gray, and denoted as “None.”

**May**

**Best Case Scenario - FPC  $\geq$  70%**

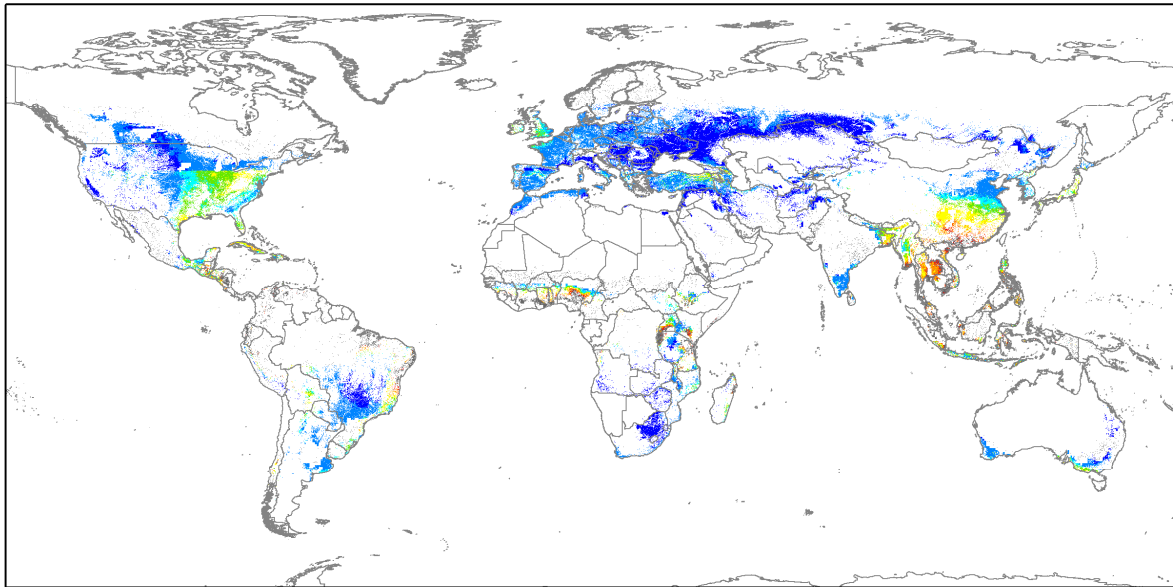

**Worst Case Scenario - FPC  $\geq$  95%**

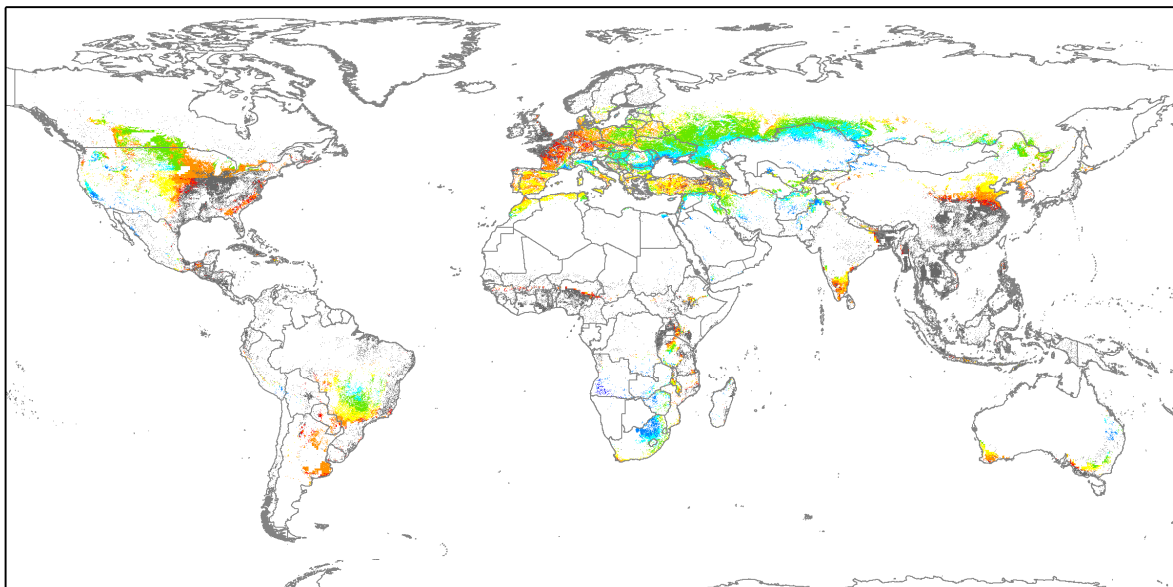

**Constellations Capable of Meeting Required Revisit Frequency**

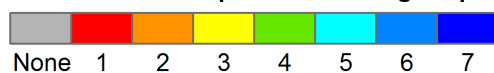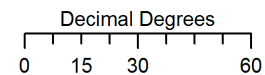

**Figure S5.** During the month of May, where each constellation is capable of meeting the revisit frequency required to yield a view of in-season croplands that is at least 70% ((**top**), “best case scenario”) or 95% ((**bottom**), “worst case scenario”) clear. In-season croplands have been defined by the growing season calendars from Whitcraft *et al.* (2014) [48] and the cropland mask from Fritz *et al.* (2015) [49]. The missions included in Constellations #1–7 can be found in Table 2. Note that constellation number both identifies the constellation, as well as denotes its rank in terms of revisit frequency (with #1 being capable of the most frequent revisit). Areas requiring a revisit more frequent than any hypothetical constellation analyzed herein are shown in gray, and denoted as “None.”

## June

Best Case Scenario - FPC  $\geq$  70%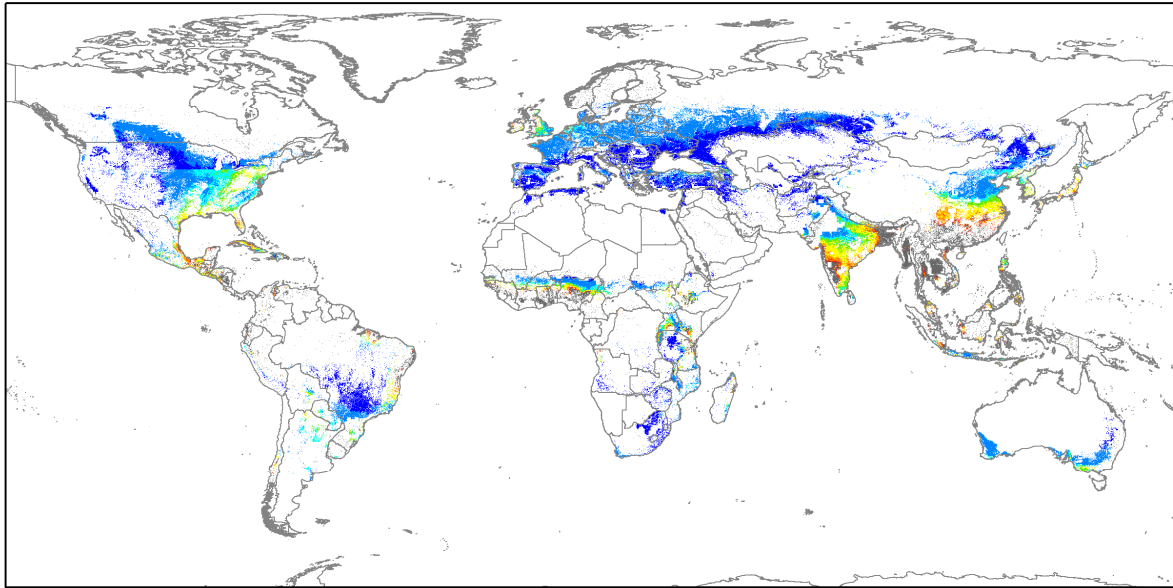Worst Case Scenario - FPC  $\geq$  95%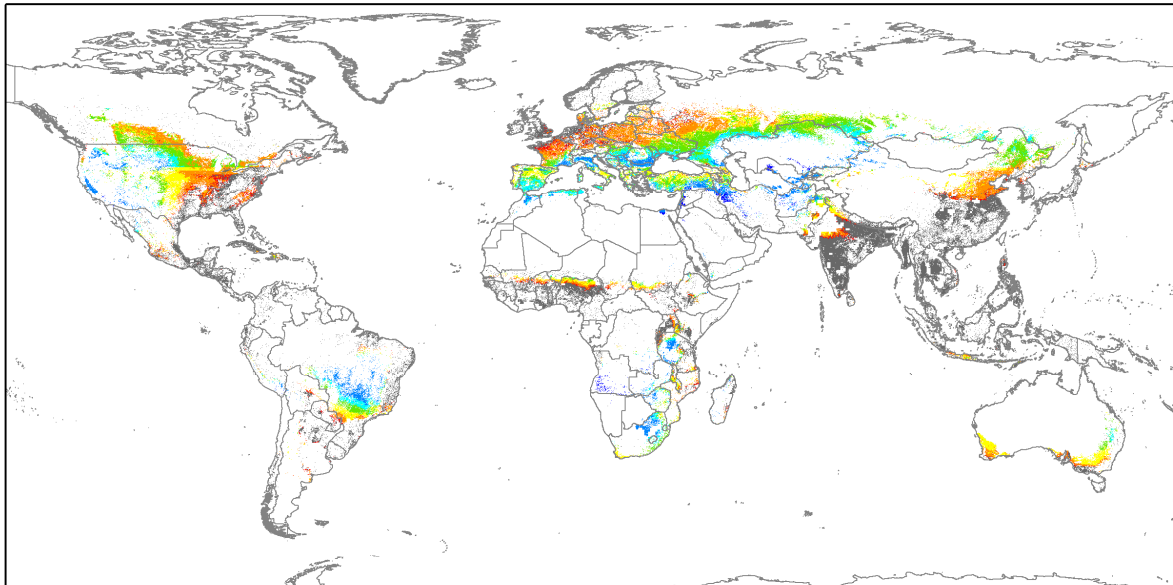

Constellations Capable of Meeting Required Revisit Frequency

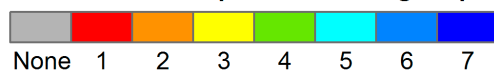Decimal Degrees  
0 15 30 60

**Figure S6.** During the month of June, where each constellation is capable of meeting the revisit frequency required to yield a view of in-season croplands that is at least 70% ((**top**), “best case scenario”) or 95% ((**bottom**), “worst case scenario”) clear. In-season croplands have been defined by the growing season calendars from Whitcraft *et al.* (2014) [48] and the cropland mask from Fritz *et al.* (2015) [49]. The missions included in Constellations #1–7 can be found in Table 2. Note that constellation number both identifies the constellation, as well as denotes its rank in terms of revisit frequency (with #1 being capable of the most frequent revisit). Areas requiring a revisit more frequent than any hypothetical constellation analyzed herein are shown in gray, and denoted as “None.”

## July

Best Case Scenario - FPC  $\geq$  70%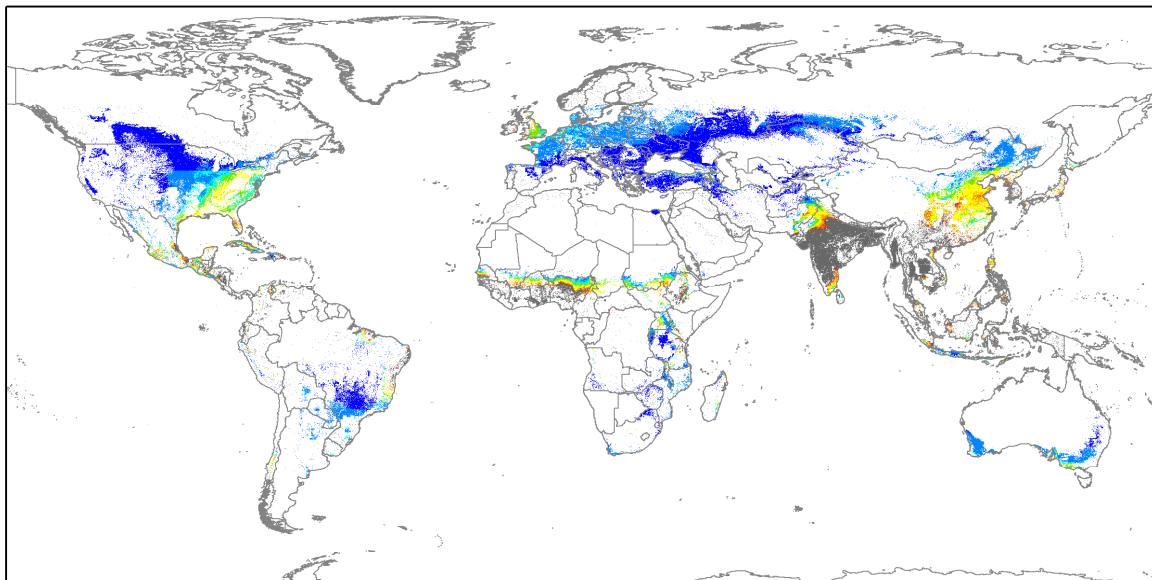Worst Case Scenario - FPC  $\geq$  95%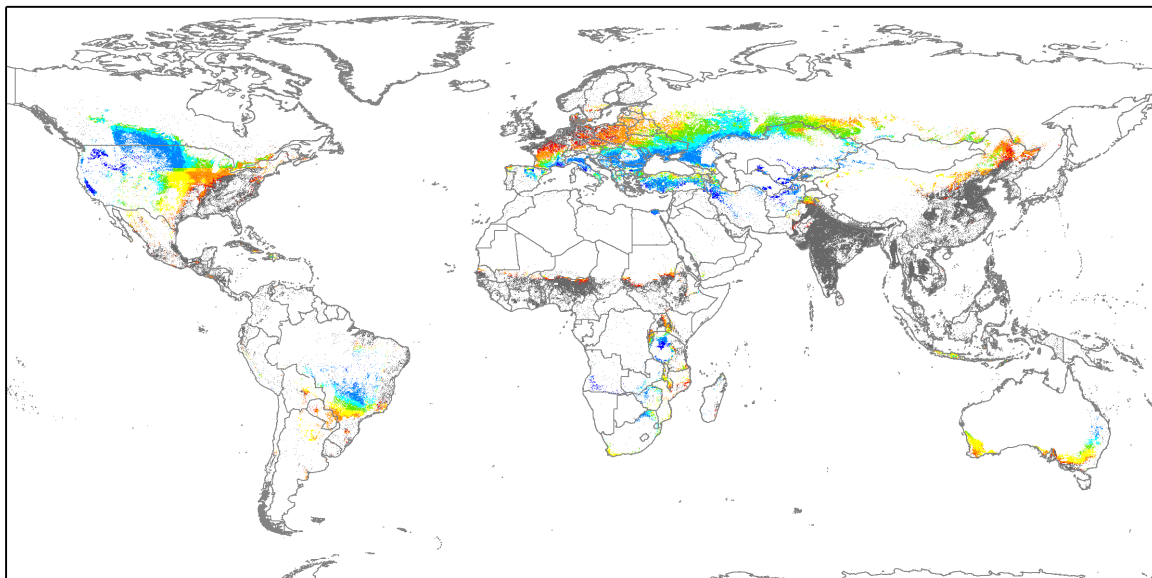

Constellations Capable of Meeting Required Revisit Frequency

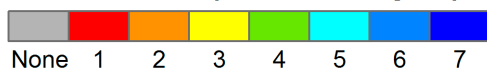
 Decimal Degrees  
 0 15 30 60

**Figure S7.** During the month of July, where each constellation is capable of meeting the revisit frequency required to yield a view of in-season croplands that is at least 70% ((**top**), “best case scenario”) or 95% ((**bottom**), “worst case scenario”) clear. In-season croplands have been defined by the growing season calendars from Whitcraft *et al.* (2014) [48] and the cropland mask from Fritz *et al.* (2015) [49]. The missions included in Constellations #1–7 can be found in Table 2. Note that constellation number both identifies the constellation, as well as denotes its rank in terms of revisit frequency (with #1 being capable of the most frequent revisit). Areas requiring a revisit more frequent than any hypothetical constellation analyzed herein are shown in gray, and denoted as “None.”



**August**

**Best Case Scenario - FPC >= 70%**

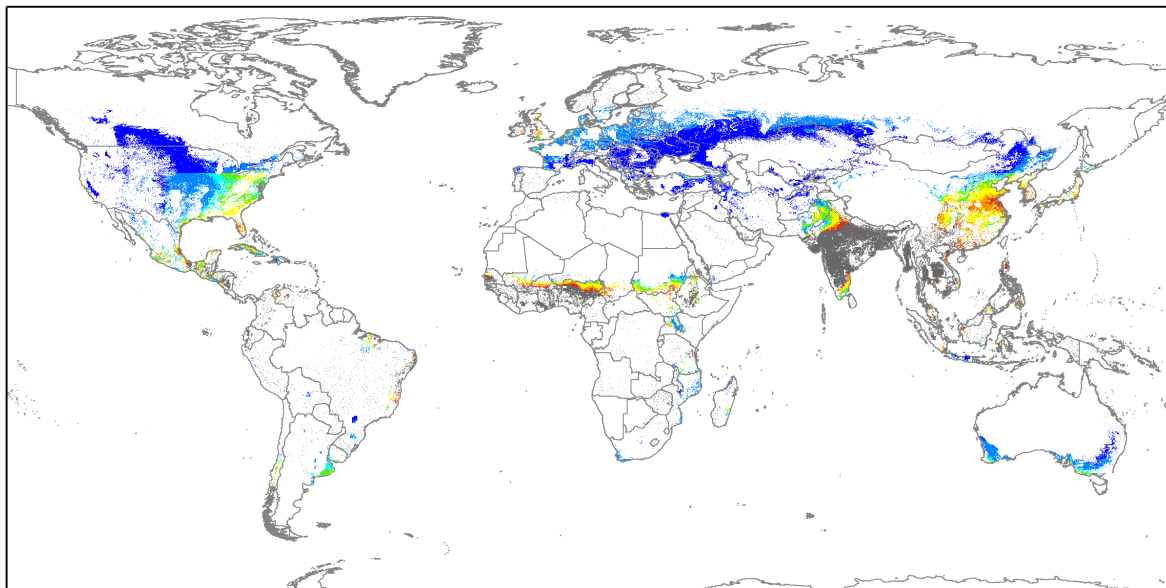

**Worst Case Scenario - FPC >= 95%**

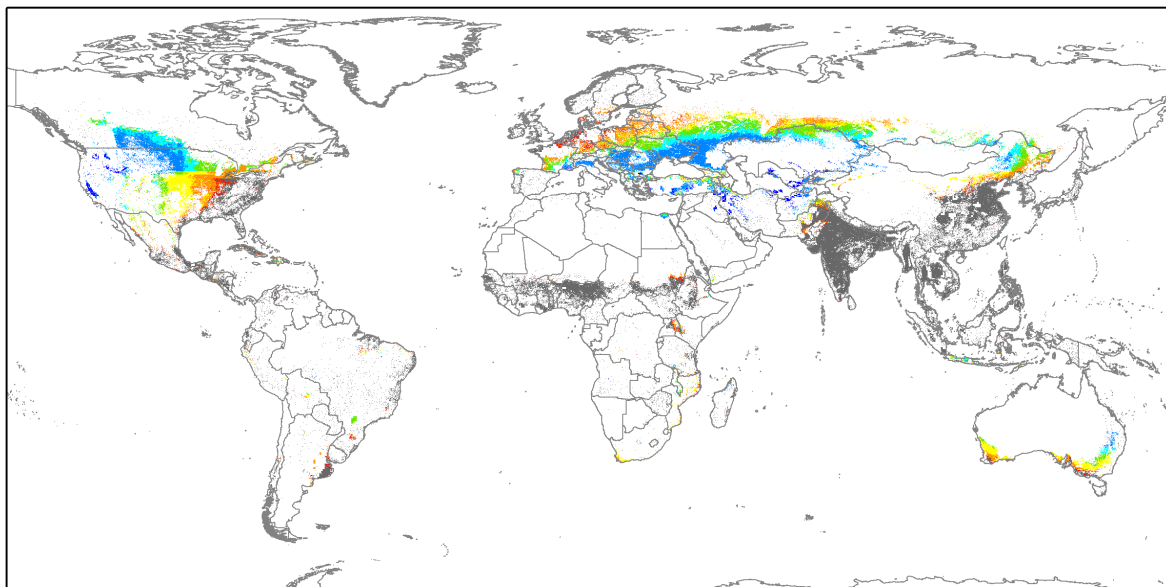

**Constellations Capable of Meeting Required Revisit Frequency**

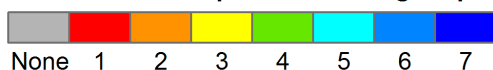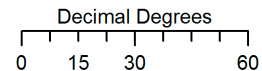

**Figure S8.** During the month of August, where each constellation is capable of meeting the revisit frequency required to yield a view of in-season croplands that is at least 70% ((**top**), “best case scenario”) or 95% ((**bottom**), “worst case scenario”) clear. In-season croplands have been defined by the growing season calendars from Whitcraft *et al.* (2014) [48] and the cropland mask from Fritz *et al.* (2015) [49]. The missions included in Constellations #1–7 can be found in Table 2. Note that constellation number both identifies the constellation, as well as denotes its rank in terms of revisit frequency (with #1 being capable of the most frequent revisit). Areas requiring a revisit more frequent than any hypothetical constellation analyzed herein are shown in gray, and denoted as “None.”

**September**

**Best Case Scenario - FPC >= 70%**

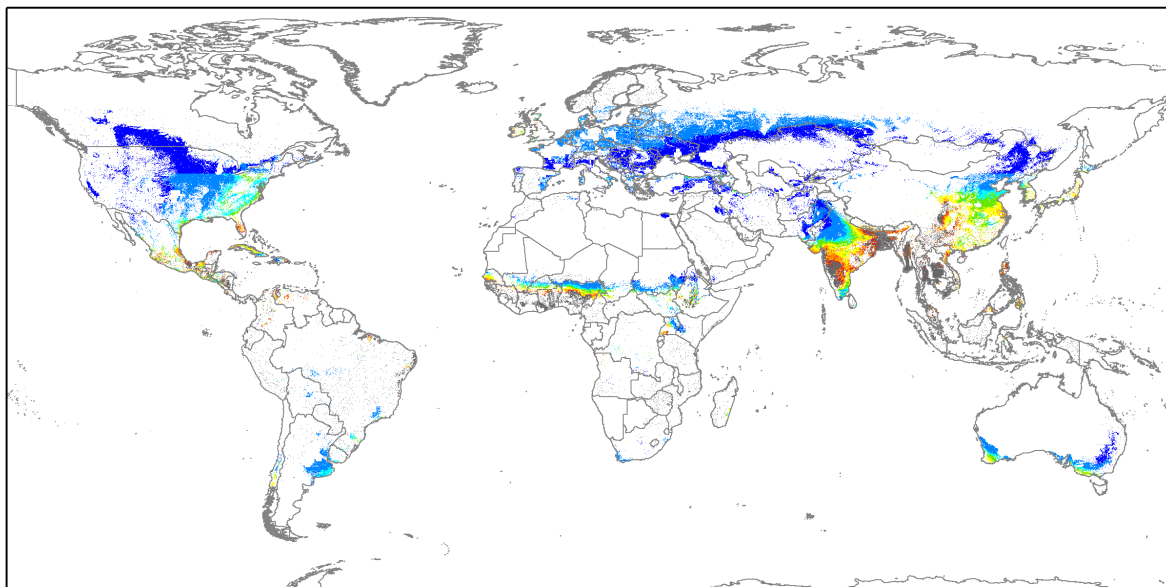

**Worst Case Scenario - FPC >= 95%**

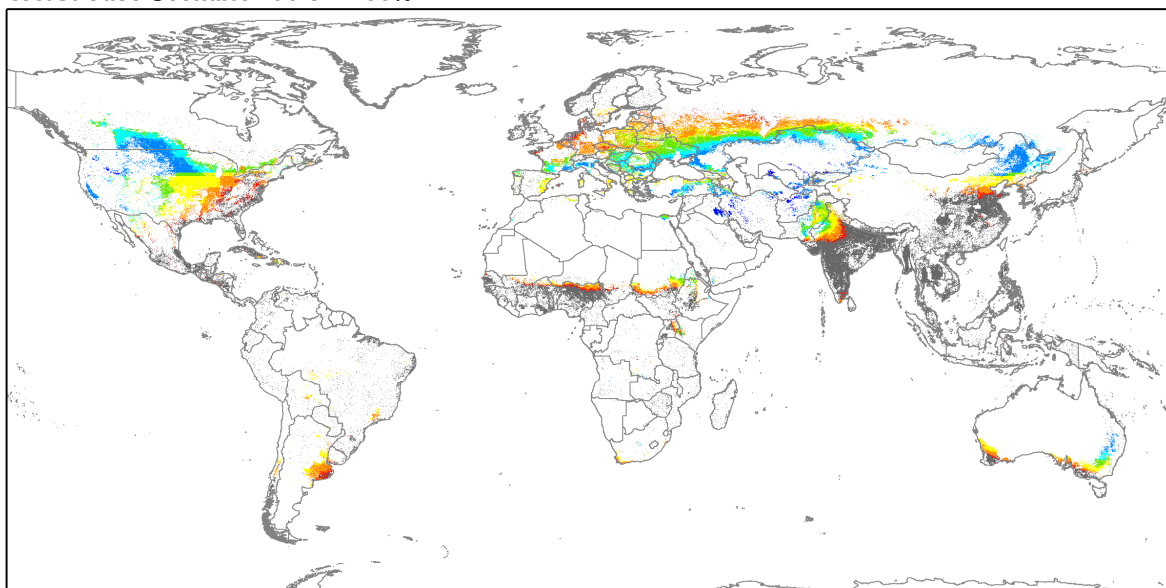

**Constellations Capable of Meeting Required Revisit Frequency**

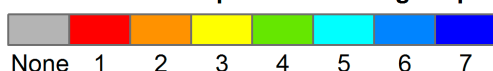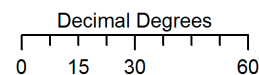

**Figure S9.** During the month of September, where each constellation is capable of meeting the revisit frequency required to yield a view of in-season croplands that is at least 70% ((**top**), “best case scenario”) or 95% ((**bottom**), “worst case scenario”) clear. In-season croplands have been defined by the growing season calendars from Whitcraft *et al.* (2014) [48] and the cropland mask from Fritz *et al.* (2015) [49]. The missions included in Constellations #1–7 can be found in Table 2. Note that constellation number both identifies the constellation, as well as denotes its rank in terms of revisit frequency (with #1 being capable of the most frequent revisit). Areas requiring a revisit more frequent than any hypothetical constellation analyzed herein are shown in gray, and denoted as “None.”

## October

Best Case Scenario - FPC  $\geq$  70%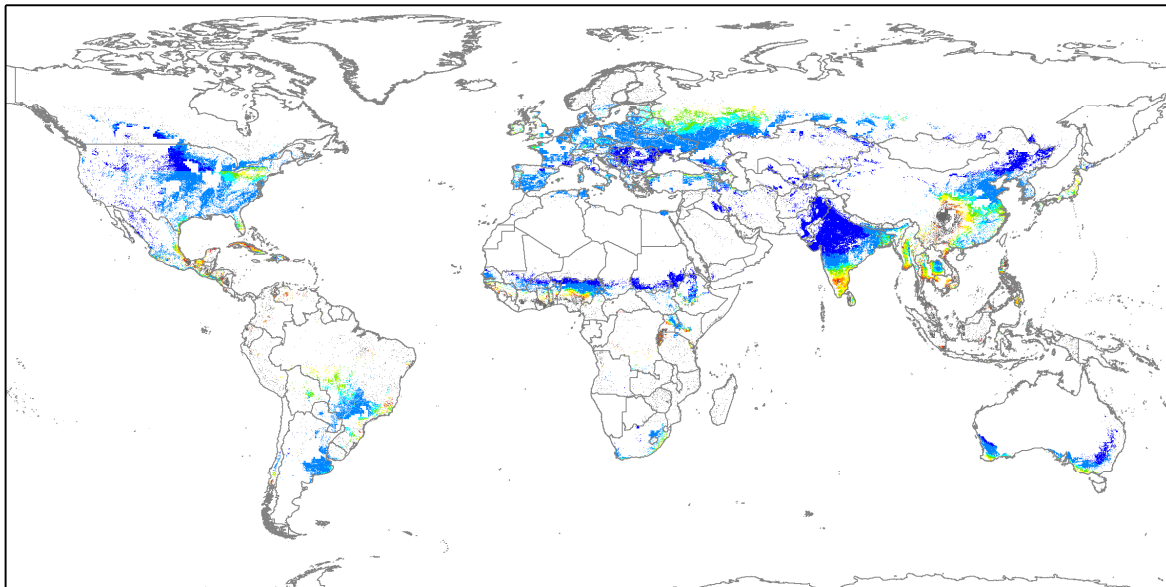Worst Case Scenario - FPC  $\geq$  95%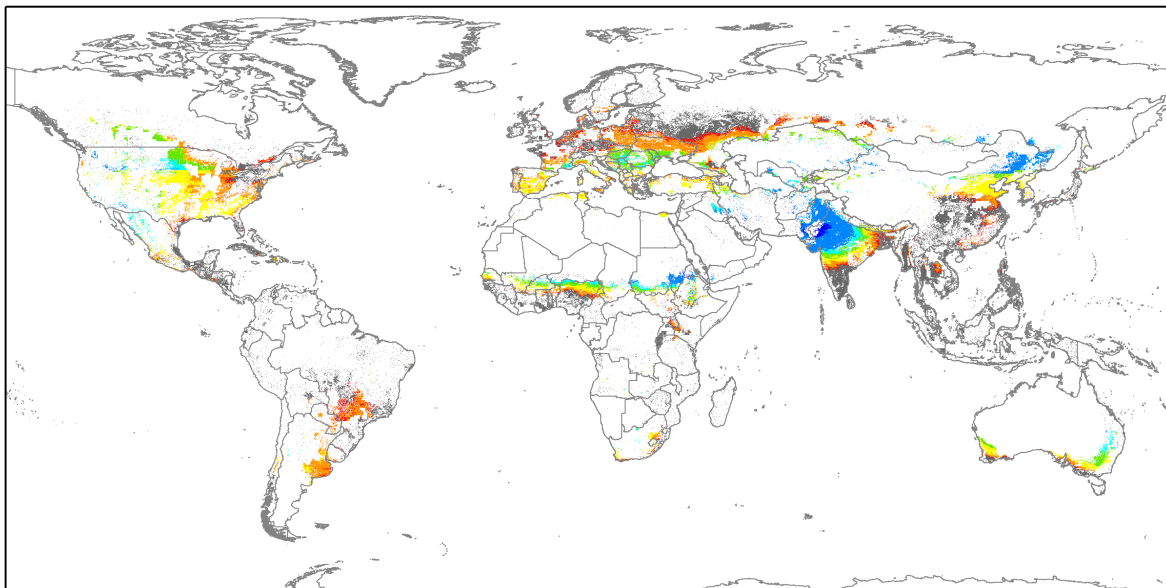

Constellations Capable of Meeting Required Revisit Frequency

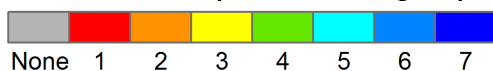Decimal Degrees  
0 15 30 60

**Figure S10.** During the month of October, where each constellation is capable of meeting the revisit frequency required to yield a view of in-season croplands that is at least 70% ((**top**), “best case scenario”) or 95% ((**bottom**), “worst case scenario”) clear. In-season croplands have been defined by the growing season calendars from Whitcraft *et al.* (2014) [48] and the cropland mask from Fritz *et al.* (2015) [49]. The missions included in Constellations #1–7 can be found in Table 2. Note that constellation number both identifies the constellation, as well as denotes its rank in terms of revisit frequency (with #1 being capable of the most frequent revisit). Areas requiring a revisit more frequent than any hypothetical constellation analyzed herein are shown in gray, and denoted as “None.”

**November****Best Case Scenario - FPC  $\geq$  70%**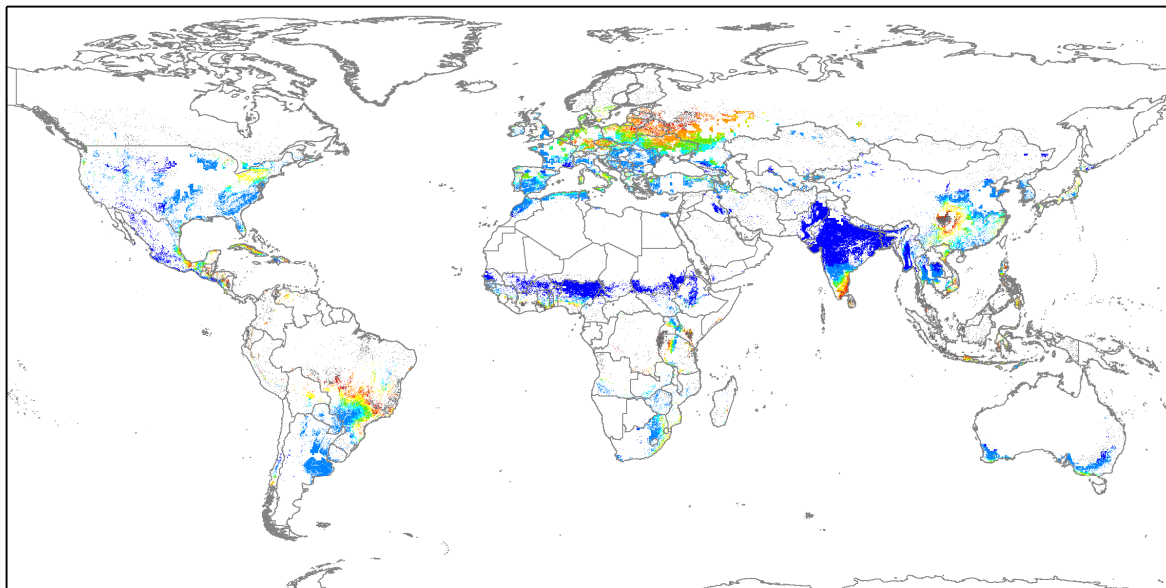**Worst Case Scenario - FPC  $\geq$  95%**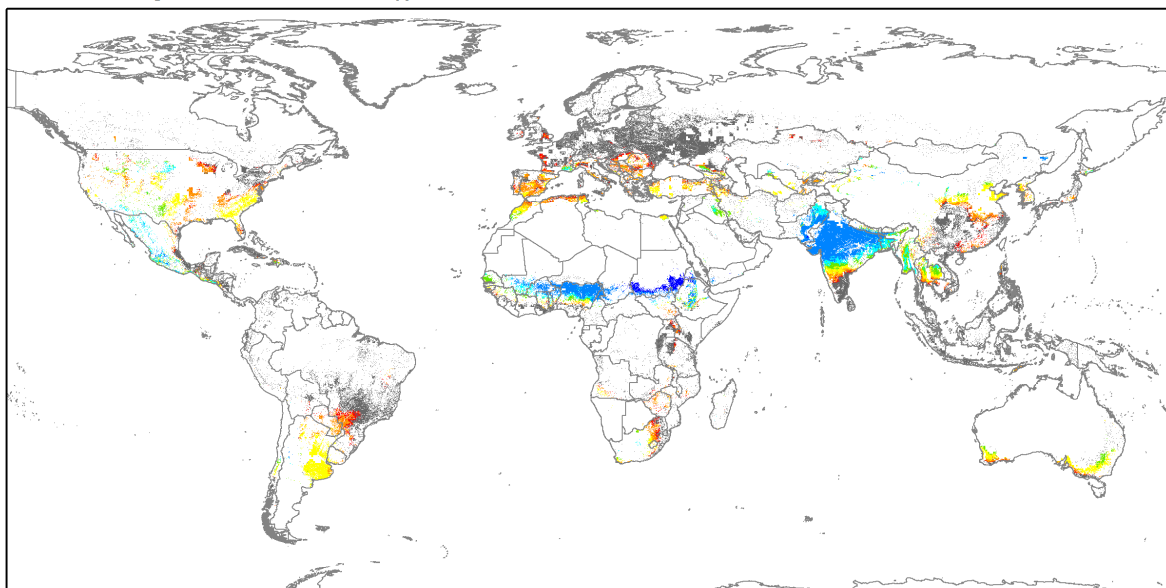**Constellations Capable of Meeting Required Revisit Frequency**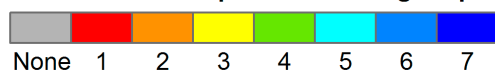

Decimal Degrees  
0 15 30 60

**Figure S11.** During the month of November, where each constellation is capable of meeting the revisit frequency required to yield a view of in-season croplands that is at least 70% ((**top**), “best case scenario”) or 95% ((**bottom**), “worst case scenario”) clear. In-season croplands have been defined by the growing season calendars from Whitcraft *et al.* (2014) [48] and the cropland mask from Fritz *et al.* (2015) [49]. The missions included in Constellations #1–7 can be found in Table 2. Note that constellation number both identifies the constellation, as well as denotes its rank in terms of revisit frequency (with #1 being capable of the most frequent revisit). Areas requiring a revisit more frequent than any hypothetical constellation analyzed herein are shown in gray, and denoted as “None.”

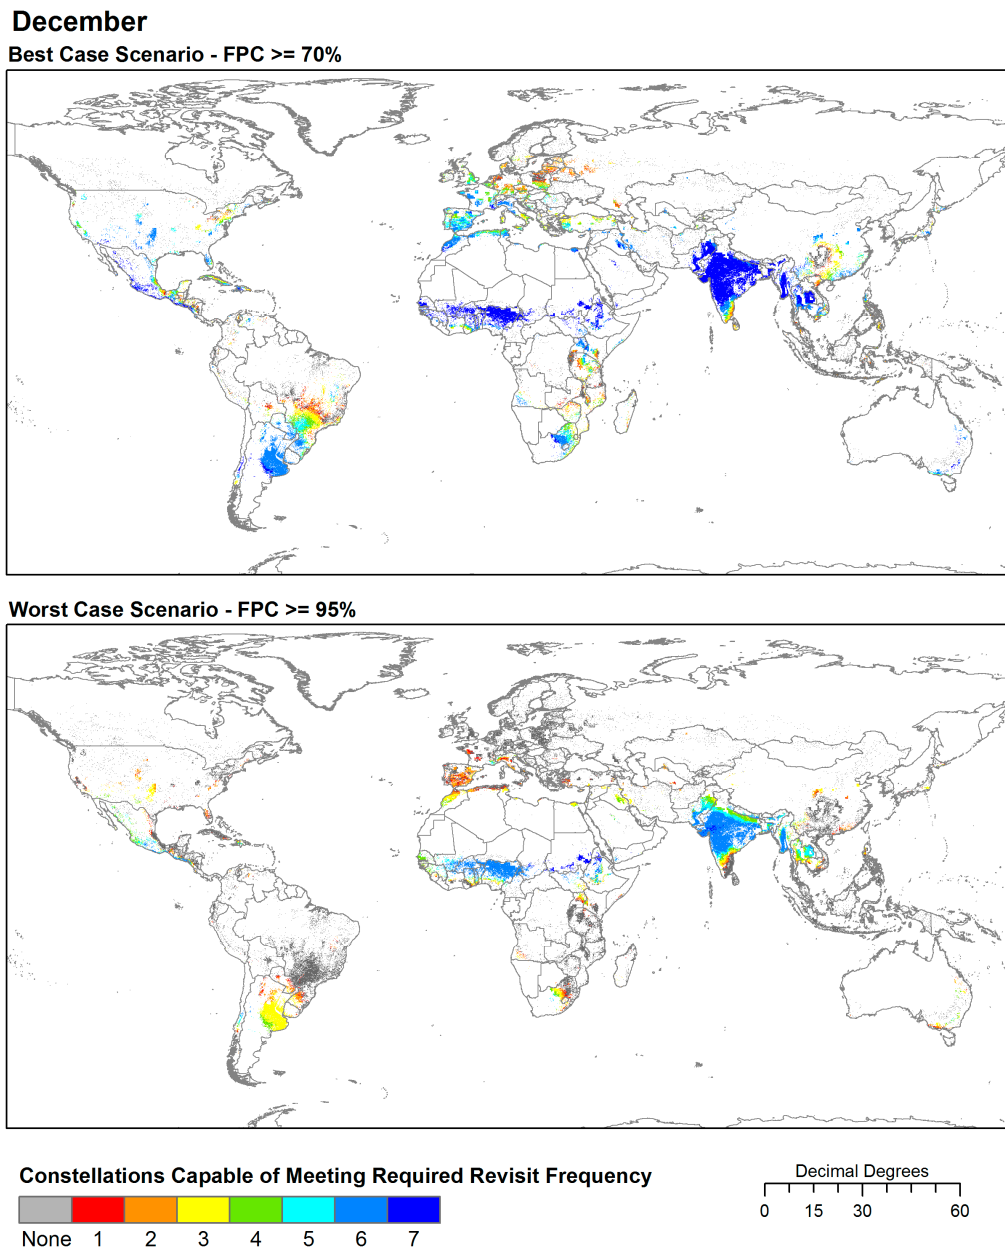

**Figure S12.** During the month of December, where each constellation is capable of meeting the revisit frequency required to yield a view of in-season croplands that is at least 70% ((**top**), “best case scenario”) or 95% ((**bottom**), “worst case scenario”) clear. In-season croplands have been defined by the growing season calendars from Whitcraft *et al.* (2014) [48] and the cropland mask from Fritz *et al.* (2015) [49]. The missions included in Constellations #1–7 can be found in Table 2. Note that constellation number both identifies the constellation, as well as denotes its rank in terms of revisit frequency (with #1 being capable of the most frequent revisit). Areas requiring a revisit more frequent than any hypothetical constellation analyzed herein are shown in gray, and denoted as “None.”
